# Supplementary material
Source: PubMed Central journal article supplement (PMC3876810)
Supplement: supp_113.051094_Supplementaltable1.pdf [file supp_113.051094_Supplementaltable1.pdf]

**Article Title:** The Relative Contributions of CYP3A4 and CYP3A5 to the Metabolism of Vinorelbine

**Authors:** Ariel R. Topletz, Ph.D., Jennifer B. Dennison, Ph.D., Robert J. Barbuch, Ph.D., Chad E. Hadden, Ph.D., Stephen D. Hall, Ph.D. and Jamie L. Renbarger, M.D., M.S.

**Journal:** Drug Metabolism and Disposition

**Supplemental Table 1:** Average percent depleted and p-values at each substrate concentration point for vinorelbine incubated with CYP3A4+b<sub>5</sub> and CYP3A5+b<sub>5</sub> supersomes as compared to –NADPH controls. Statistical significance compared to –NADPH controls were performed using the Student’s t-test.

| Initial Vinorelbine Concentration (µM)     | Percent Depleted Compared to –NADPH Control | p-value Compared to –NADPH Control |
|--------------------------------------------|---------------------------------------------|------------------------------------|
| <i>Incubated with CYP3A4+b<sub>5</sub></i> |                                             |                                    |
| 1                                          | 33.0 ± 8.2                                  | < 0.05                             |
| 2                                          | 22.1 ± 2.5                                  | < 0.01                             |
| 3                                          | 17.6 ± 4.4                                  | < 0.05                             |
| 5                                          | 12.6 ± 0.7                                  | < 0.01                             |
| 7                                          | 10.7 ± 2.2                                  | < 0.05                             |
| 10                                         | 8.5 ± 1.4                                   | < 0.05                             |
| <i>Incubated with CYP3A5+b<sub>5</sub></i> |                                             |                                    |
| 1                                          | 26.4 ± 2.2                                  | < 0.05                             |
| 2                                          | 17.0 ± 0.9                                  | < 0.01                             |
| 3                                          | 16.2 ± 3.1                                  | < 0.01                             |
| 5                                          | 11.0 ± 1.1                                  | < 0.05                             |
| 7                                          | 10.7 ± 3.1                                  | < 0.05                             |
| 10                                         | 7.5 ± 1.1                                   | 0.07                               |
